# Supplementary material for: An AI-Layered with Multi-Agent Systems Architecture for Prognostics Health Management of Smart Transformers: A Novel Approach for Smart Grid-Ready Energy Management Systems
Source: MDPI journal article supplement (doi:10.3390/en15197217), 2022-10-01

## Supplementary Materials of paper

### An AI-layered with Multi-Agent Systems Architecture for Prognostics Health Management of Smart Transformers: A Novel Approach for Smart Grid-Ready Energy Management Systems

Datasets Folder: Contains 4 datasets

-5 Gas 7 Labels Dataset

-6 Gas 4 Labels Dataset

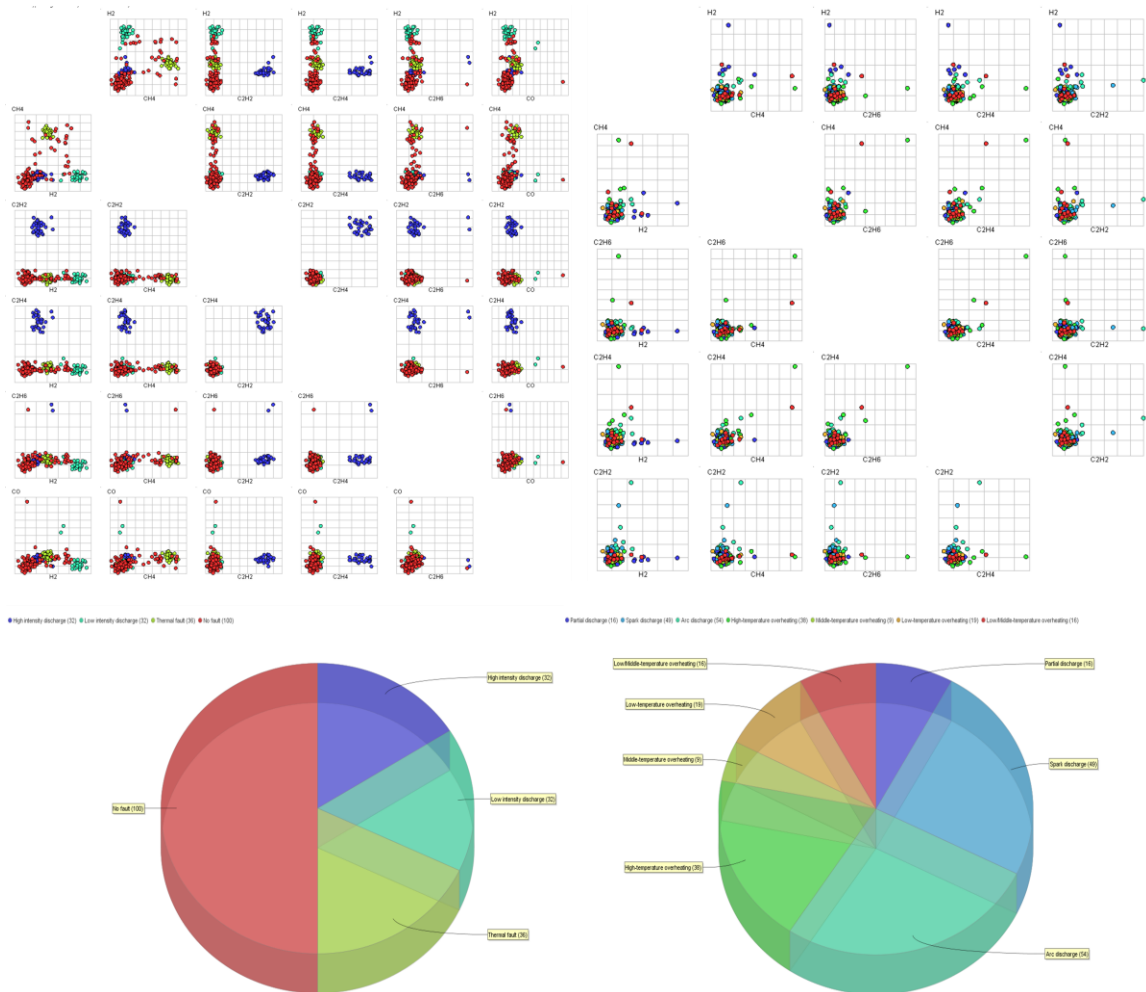

-Health Index Scoring Dataset

-Life Loss Calculation Dataset

Hydrogen Oxygen Nitrogen Methane CO CO2 Ethylene Ethane Acetylene DBDS Power factor Interfacial V Dielectric rigidity Water content

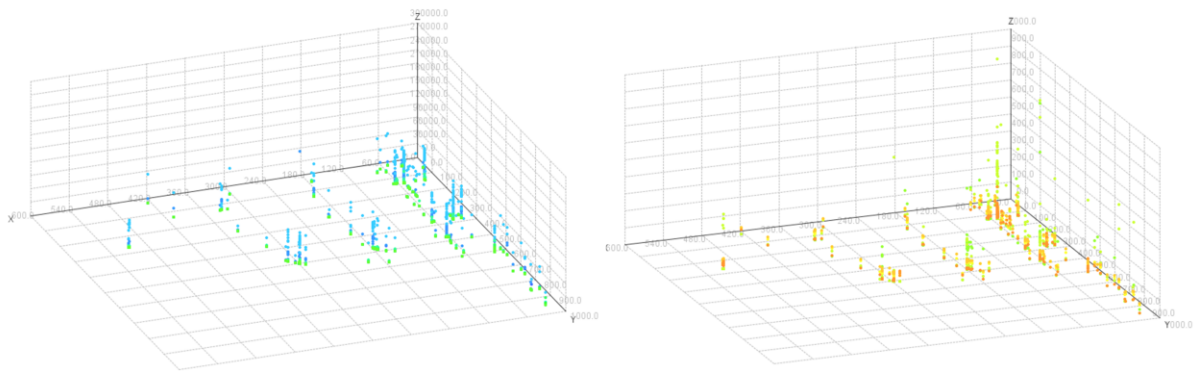

Project in Rapidminer folder contains the different developed models with optimization

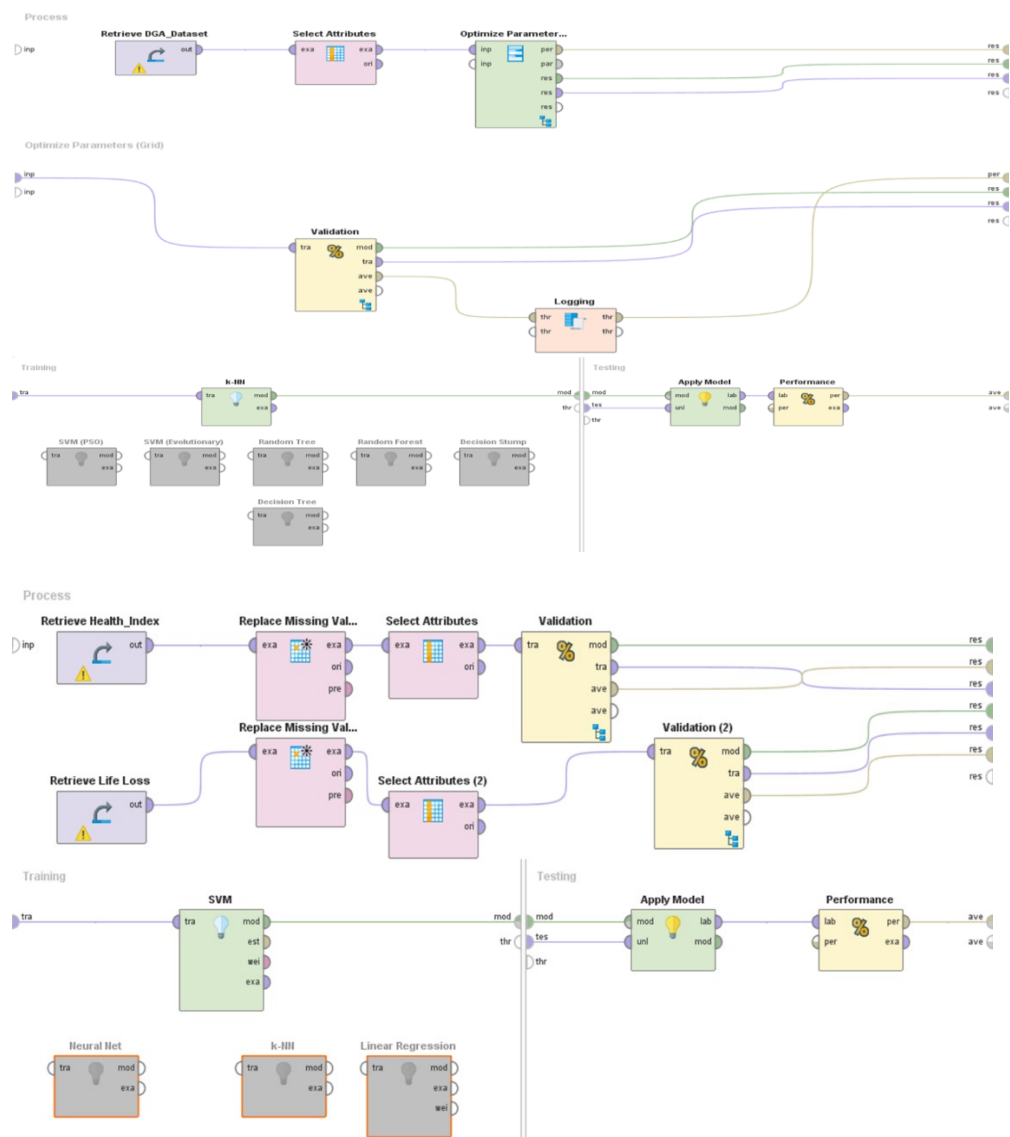

Results

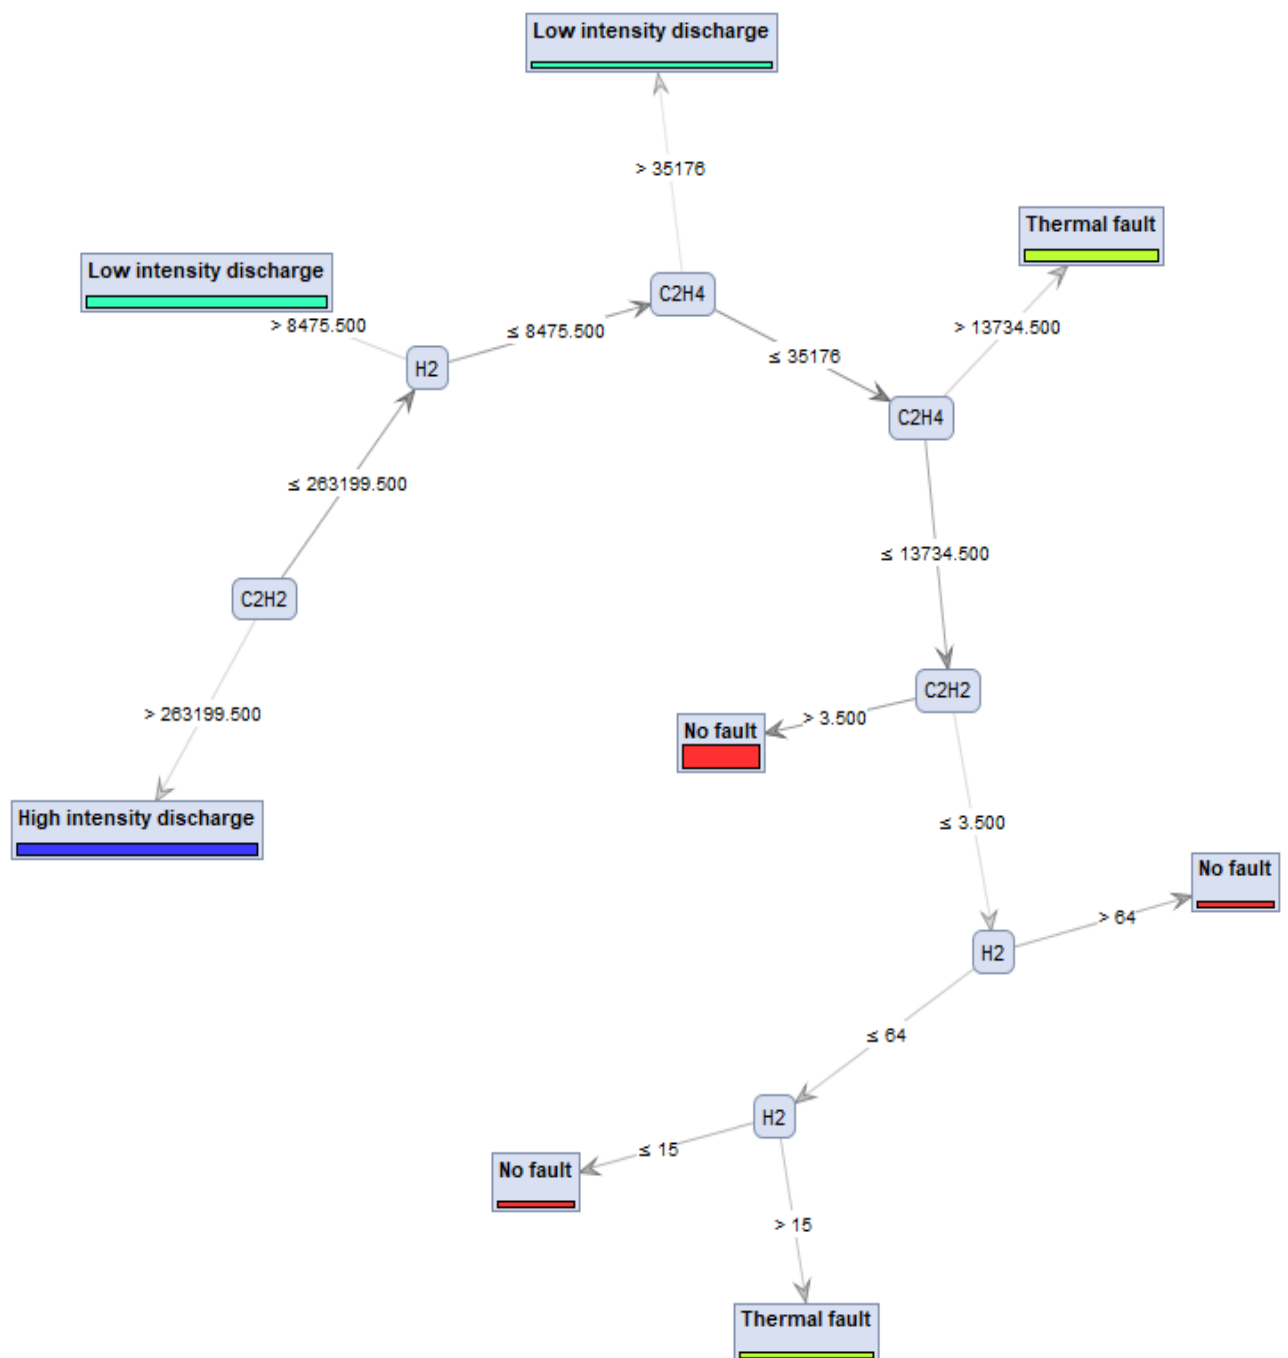

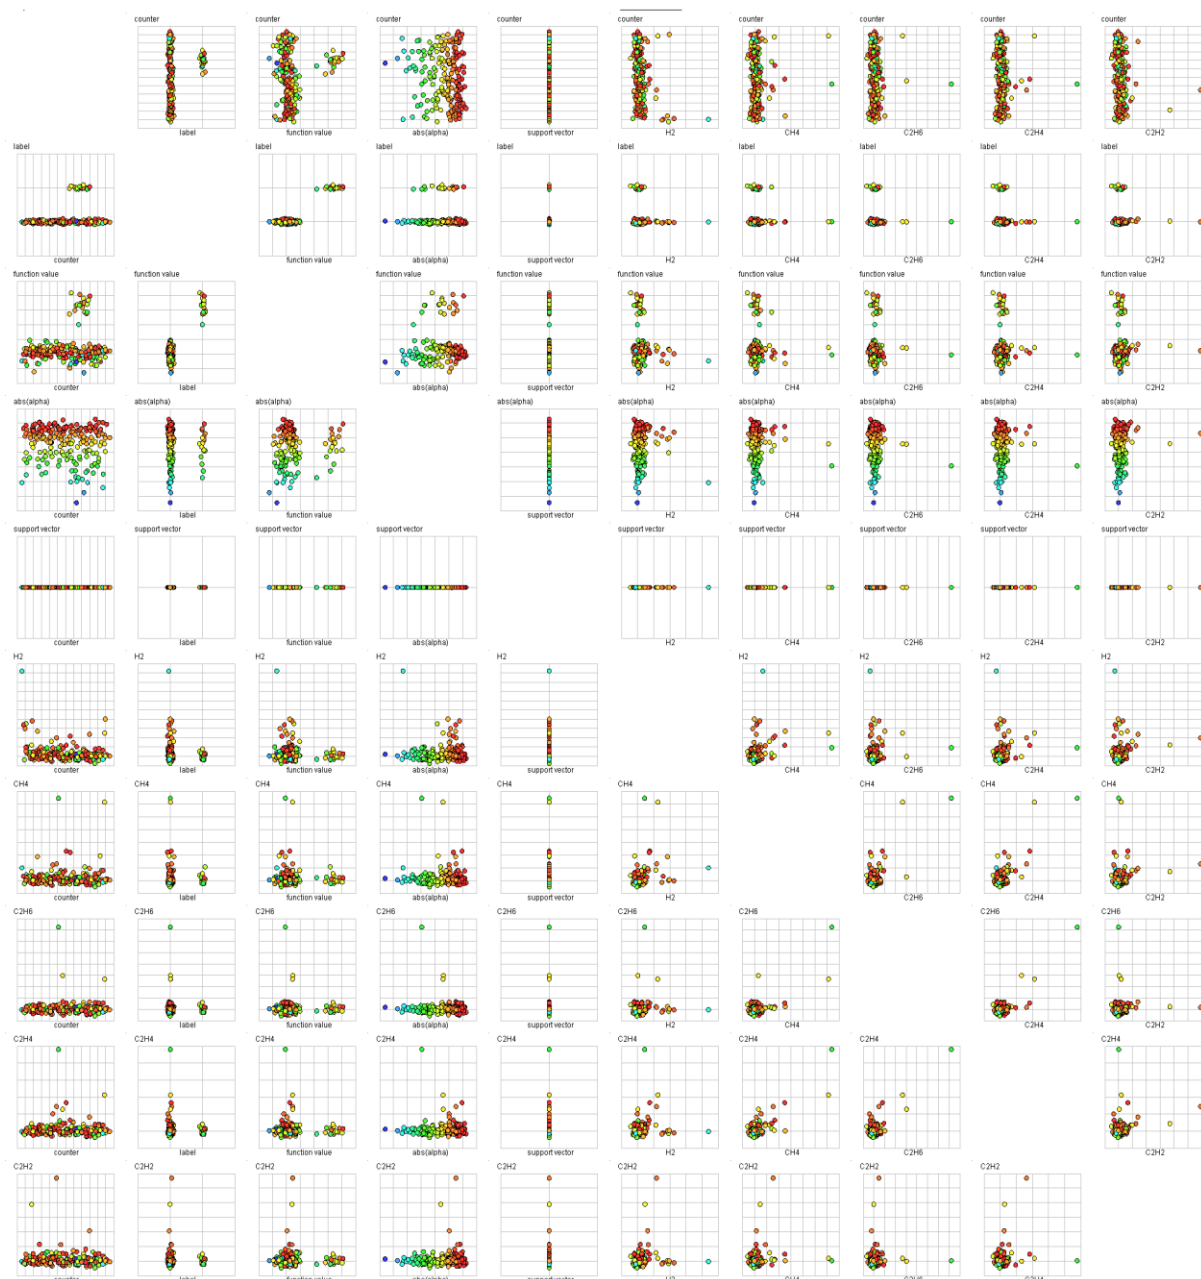

| Tested Algorithms 6Gas-4Labels | Accuracy       | Relative Error | Root Mean Squared Error | Root Relative Squared Error | Squared Error |
|--------------------------------|----------------|----------------|-------------------------|-----------------------------|---------------|
| Random Tree                    | 89.74%         | 10.81%         | 0.381                   | 0.302                       | 0.101         |
| <b>Random forest</b>           | <b>100.00%</b> | <b>4.57%</b>   | <b>0.093</b>            | <b>0.088</b>                | <b>0.009</b>  |
| Decision stump                 | 66.67%         | 47.41%         | 0.544                   | 0.518                       | 0.296         |
| Decision tree                  | 100.00%        | 0.00%          | 0                       | 0                           | 0             |
| KNN                            | 100.00%        | 0.00%          | 0                       | 0                           | 0             |
| Neural Network                 | 94.87%         | 7.02%          | 0.222                   | 0.211                       | 0.049         |

|                                      |        |        |      |      |      |
|--------------------------------------|--------|--------|------|------|------|
| SVM-PSO Radial Kernel                | 73.75% | 44.89% | 0.45 | 1.25 | 0.21 |
| SVM-PSO Multiquadric Kernel          | 36.88% | 63.13% | 0.77 | 2.43 | 0.63 |
| SVM-PSO Epachnenikov Kernel          | 76.25% | 47.56% | 0.48 | 1.33 | 0.23 |
| SVM-PSO Anova Kernel                 | 97.50% | 38.31% | 0.39 | 1.09 | 0.15 |
| SVM-Evolutionary Radial Kernel       | 83.13% | 45.13% | 0.46 | 1.25 | 0.21 |
| SVM-Evolutionary Multiquadric Kernel | 23.75% | 76.25% | 0.87 | 2.57 | 0.76 |
| SVM-Evolutionary Epachnenikov Kernel | 78.13% | 46.99% | 0.47 | 1.31 | 0.23 |
| SVM-Evolutionary Anova Kernel        | 97.50% | 37.57% | 0.38 | 1.06 | 0.15 |

| Tested Algorithms 5GAS-7Labels        | Accuracy      | Relative Error | Root Mean Squared Error | Root Relative Squared Error | Squared Error |
|---------------------------------------|---------------|----------------|-------------------------|-----------------------------|---------------|
| Random Tree                           | 43.90%        | 67.82%         | 0.701                   | 0.471                       | 0.492         |
| Random forest                         | 48.78%        | 66.62%         | 0.699                   | 0.47                        | 0.489         |
| Decision stump                        | 29.27%        | 78.86%         | 0.803                   | 0.54                        | 0.644         |
| Decision tree                         | 46.43%        | 62.84%         | 0.715                   | 0.481                       | 0.512         |
| KNN                                   | 53.66%        | 56.34%         | 0.681                   | 0.458                       | 0.463         |
| K-Grid-Optimized-KNN                  | 70.73%        | 55.74%         | 0.588                   | 0.395                       | 0.346         |
| K-Grid-Optimized-Random Forest        | 73.17%        | 63.56%         | 0.65                    | 0.437                       | 0.423         |
| SVM-PSO Radial Kernel                 | 85.71%        | 37.12%         | 0.39                    | 0.9                         | 0.15          |
| SVM-PSO Multiquadric Kernel           | 21.67%        | 78.33%         | 0.88                    | 2.21                        | 0.73          |
| SVM-PSO Epachnenikov Kernel           | 75.24%        | 50.00%         | 0.5                     | 1.22                        | 0.25          |
| SVM-PSO Anova Kernel                  | 69.29%        | 46.34%         | 0.48                    | 1.14                        | 0.22          |
| <b>SVM-Evolutionary Radial Kernel</b> | <b>85.95%</b> | <b>48.20%</b>  | <b>0.48</b>             | <b>1.17</b>                 | <b>0.23</b>   |
| SVM-Evolutionary Multiquadric Kernel  | 28.81%        | 71.19%         | 0.84                    | 2.11                        | 0.71          |
| SVM-Evolutionary Epachnenikov Kernel  | 85.71%        | 48.53%         | 0.49                    | 1.18                        | 0.24          |
| SVM-Evolutionary Anova Kernel         | 85.48%        | 44.51%         | 0.45                    | 1.09                        | 0.2           |

| Tested Algorithms 6Gas-4Labels | Accuracy | Relative Error | Root Mean Squared Error | Root Relative Squared Error | Squared Error |
|--------------------------------|----------|----------------|-------------------------|-----------------------------|---------------|
| Random Tree                    | 89.74%   | 10.81%         | 0.381                   | 0.302                       | 0.101         |

|                                      |                |              |              |              |              |
|--------------------------------------|----------------|--------------|--------------|--------------|--------------|
| <b>Random forest</b>                 | <b>100.00%</b> | <b>4.57%</b> | <b>0.093</b> | <b>0.088</b> | <b>0.009</b> |
| Decision stump                       | 66.67%         | 47.41%       | 0.544        | 0.518        | 0.296        |
| Decision tree                        | 100.00%        | 0.00%        | 0            | 0            | 0            |
| KNN                                  | 100.00%        | 0.00%        | 0            | 0            | 0            |
| Neural Network                       | 94.87%         | 7.02%        | 0.222        | 0.211        | 0.049        |
| SVM-PSO Radial Kernel                | 73.75%         | 44.89%       | 0.45         | 1.25         | 0.21         |
| SVM-PSO Multiquadric Kernel          | 36.88%         | 63.13%       | 0.77         | 2.43         | 0.63         |
| SVM-PSO Epachnenikov Kernel          | 76.25%         | 47.56%       | 0.48         | 1.33         | 0.23         |
| SVM-PSO Anova Kernel                 | 97.50%         | 38.31%       | 0.39         | 1.09         | 0.15         |
| SVM-Evolutionary Radial Kernel       | 83.13%         | 45.13%       | 0.46         | 1.25         | 0.21         |
| SVM-Evolutionary Multiquadric Kernel | 23.75%         | 76.25%       | 0.87         | 2.57         | 0.76         |
| SVM-Evolutionary Epachnenikov Kernel | 78.13%         | 46.99%       | 0.47         | 1.31         | 0.23         |
| SVM-Evolutionary Anova Kernel        | 97.50%         | 37.57%       | 0.38         | 1.06         | 0.15         |

| <b>Tested Algorithms Life Loss</b> | <b>Root Mean Squared Error</b> | <b>Absolute Error</b> | <b>Normalized Absolute Error</b> | <b>Squared Error</b> |
|------------------------------------|--------------------------------|-----------------------|----------------------------------|----------------------|
| Neural Network                     | 116.039                        | 50.719                | 0.737                            | 13465.07             |
| <b>KNN</b>                         | <b>111.728</b>                 | <b>71.048</b>         | <b>1.033</b>                     | <b>12483.2</b>       |
| Linear Regression                  | 114.833                        | 72.274                | 1.05                             | 13186.68             |
| dot kernel SVM                     | 114.571                        | 49.665                | 0.722                            | 13126.6              |
| Radial kernel SVM                  | 115.495                        | 50.23                 | 0.73                             | 13339.08             |
| Neural Kernal SVM                  | 116.527                        | 56.437                | 0.82                             | 13578.48             |
| Anova Kernel SVM                   | 114.719                        | 49.653                | 0.722                            | 13160.44             |
| Epachnenikov Kernel SVM            | 115.659                        | 50.454                | 0.733                            | 13376.93             |

| <b>Tested Algorithms Health Index</b> | <b>Root Mean Squared Error</b> | <b>Absolute Error</b> | <b>Normalized Absolute Error</b> | <b>Squared Error</b> |
|---------------------------------------|--------------------------------|-----------------------|----------------------------------|----------------------|
| Neural Network                        | 223.431                        | 131.808               | 0.863                            | 49921.43             |
| KNN                                   | 176.039                        | 125.643               | 0.822                            | 30989.86             |
| <b>Linear Regression</b>              | <b>173.713</b>                 | <b>112.349</b>        | <b>0.735</b>                     | <b>30176.4</b>       |
| dot kernel SVM                        | 201.438                        | 122.225               | 0.8                              | 40577.39             |
| Radial kernel SVM                     | 221.328                        | 131.114               | 0.858                            | 48986.25             |

|                         |         |         |       |          |
|-------------------------|---------|---------|-------|----------|
| Neural Kernal SVM       | 175.728 | 114.246 | 0.748 | 30880.36 |
| Anova Kernel SVM        | 213.16  | 128.1   | 0.838 | 45437.39 |
| Epachnenikov Kernel SVM | 223.362 | 131.686 | 0.862 | 49890.74 |

A comparative study of the results

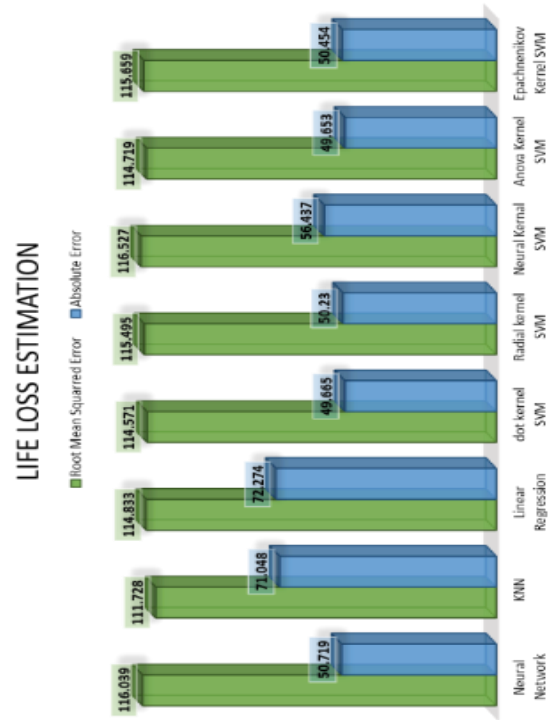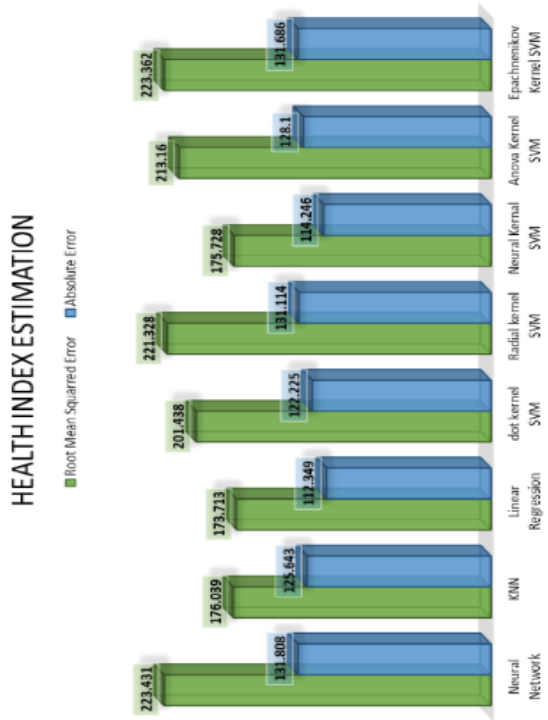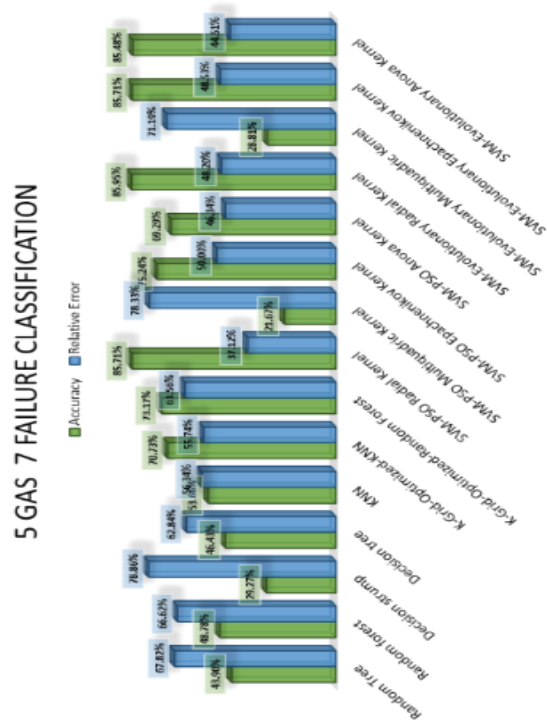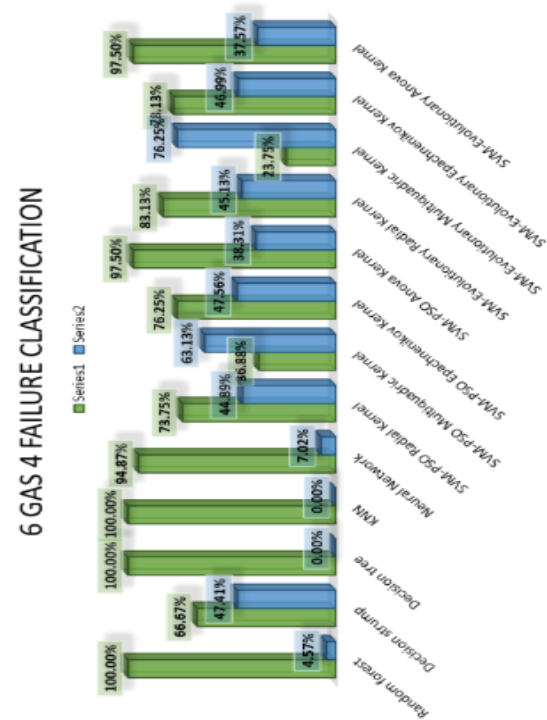

## The Developed Monitoring Platform for Power Transformers using (Thingsboard)

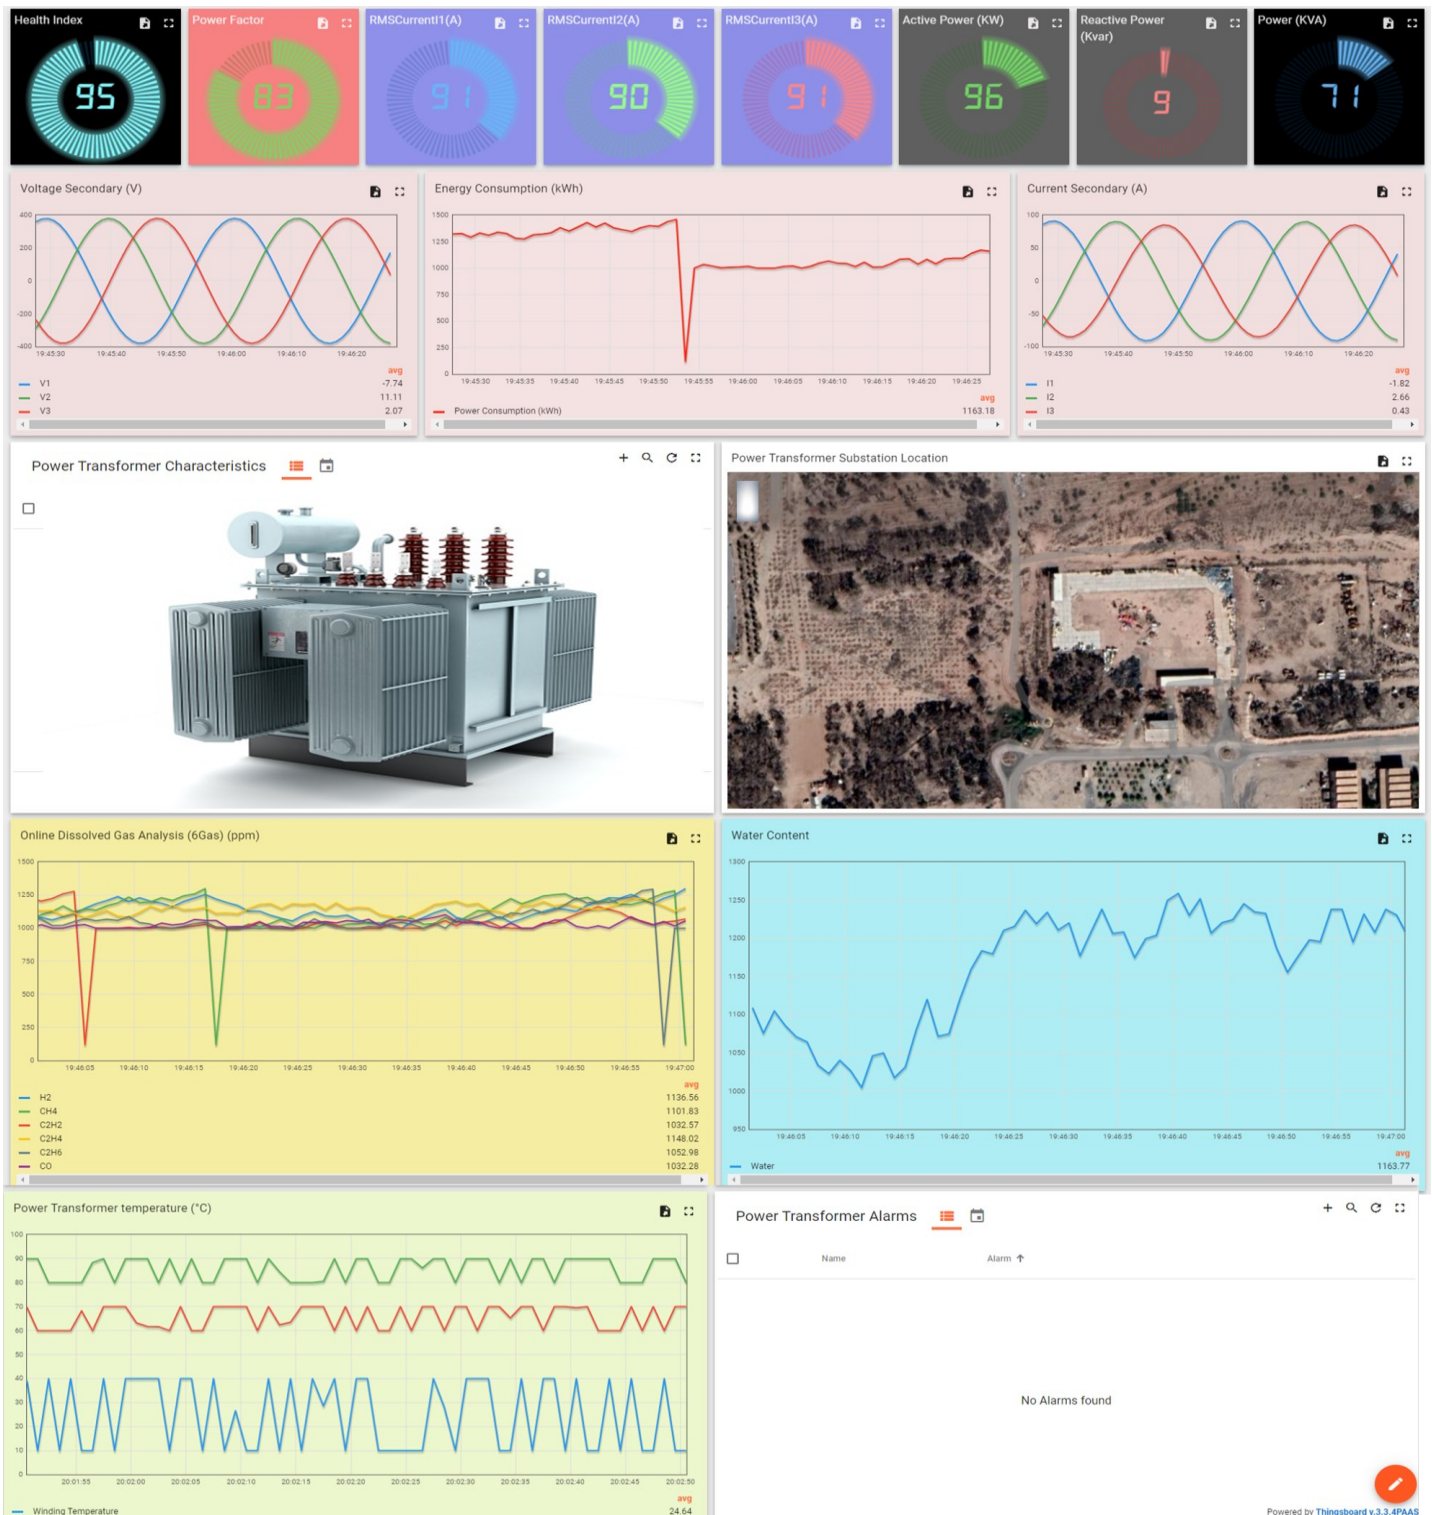

Supplement: s1 [file s1]
